# Supplementary material for: A Germline-Targeting Chimpanzee SIV Envelope Glycoprotein Elicits a New Class of V2-Apex Directed Cross-Neutralizing Antibodies
Source: PubMed Central journal article supplement (PMC9973348; doi:10.1128/mbio.03370-22), 2023-01-11
Supplement: mbio.03370-22-s0002.pdf [file mbio.03370-22-s0002.pdf]

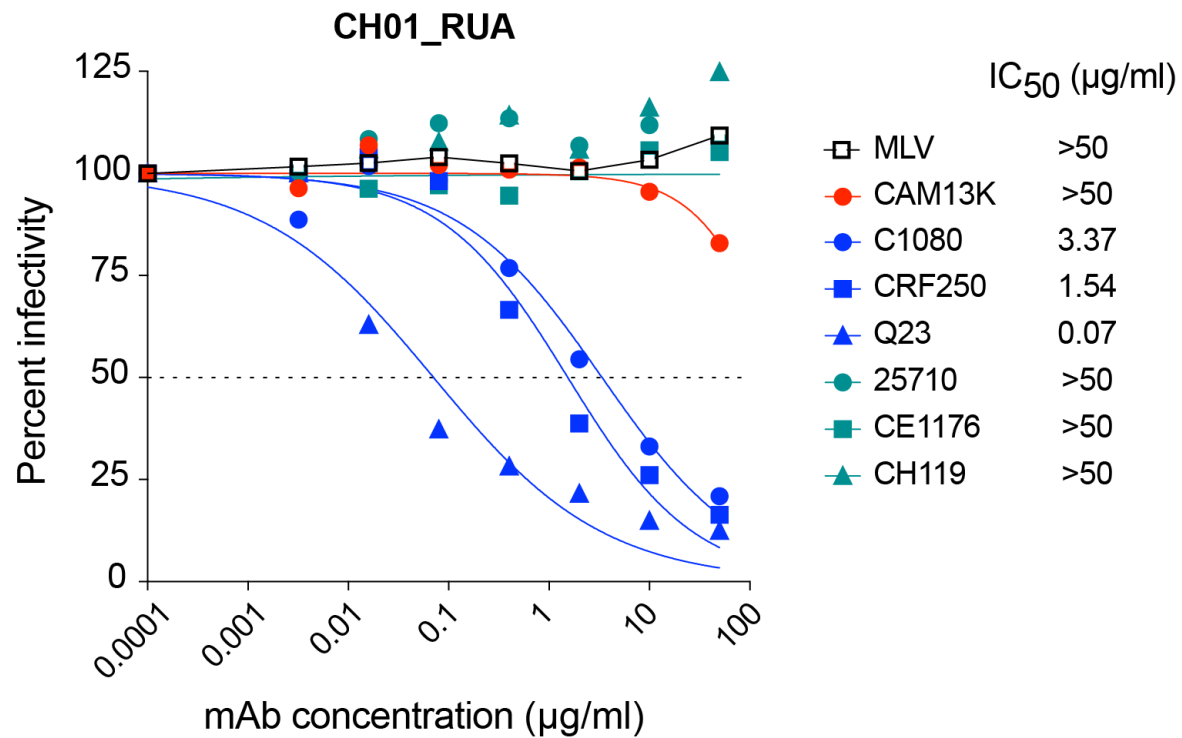

**FIG S2 Sensitivity of HIV-1 Env pseudoviruses to neutralization by CH01\_RUA.** Pseudoviruses carrying different HIV-1 Envs (C1080, CRF250, Q23, 25710, CE1176, CH119) were tested for their sensitivity to neutralization by the human V2-apex precursor CH01\_RUA. The dashed line indicates 50% reduction in virus infectivity and the corresponding 50% inhibitory concentrations (IC<sub>50</sub> values in µg/ml) are listed on the right. HIV-1 pseudoviruses sensitive to CH01\_RUA are colored in blue, while resistant strains are shown in green. CAM13K (red) and MLV (black) pseudotypes are shown for control.
