# Supplementary material for: A Germline-Targeting Chimpanzee SIV Envelope Glycoprotein Elicits a New Class of V2-Apex Directed Cross-Neutralizing Antibodies
Source: PubMed Central journal article supplement (PMC9973348; doi:10.1128/mbio.03370-22), 2023-01-11
Supplement: mbio.03370-22-s0004.pdf [file mbio.03370-22-s0004.pdf]

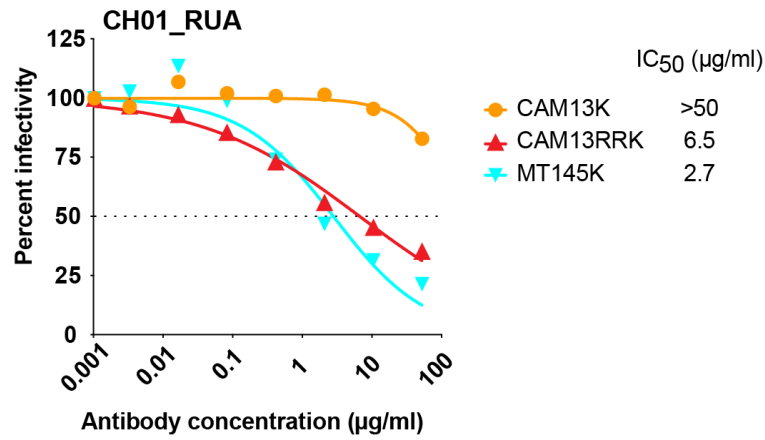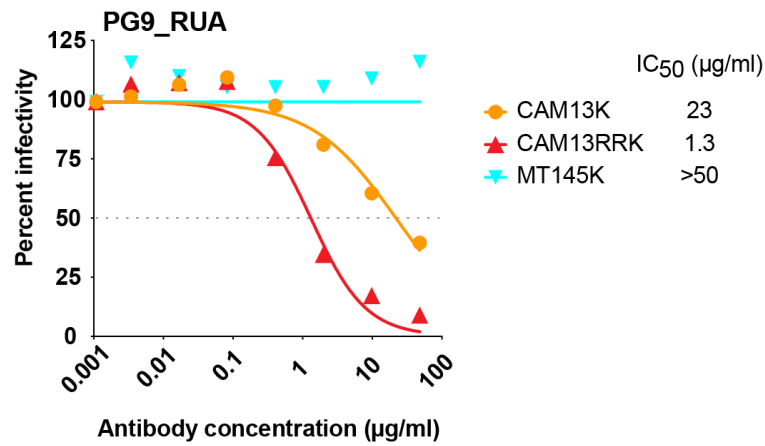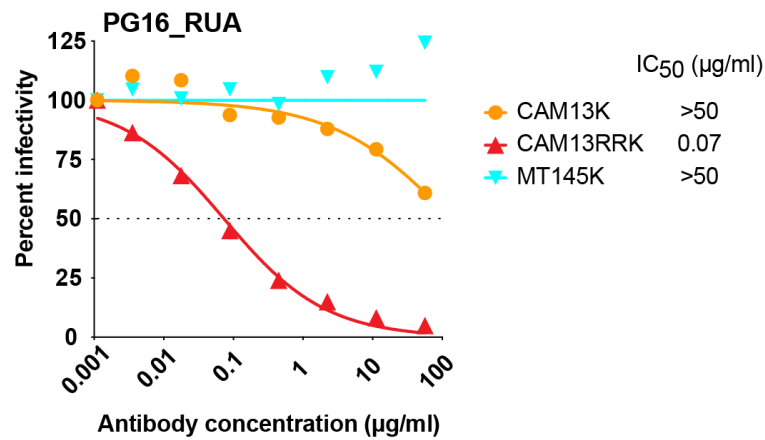

**FIG S4 Sensitivity of CAM13RRK to neutralization by V2-apex bNAbs precursors.**

Neutralization curves are shown for human V2-apex bNAbs precursors (indicated on top) against CAM13K (CAM13\_Q171K), CAM13RRK (CAM13\_Q171K\_K169R\_K170R) and MT145K

(MT145\_Q171K) Env bearing pseudoviruses, all of which encode the wildtype methionine amino acid at position 375. The dashed line indicates 50% reduction in virus infectivity and the corresponding 50% inhibitory concentrations ( $IC_{50}$  values in  $\mu\text{g/ml}$ ) are listed on the right.
