# Supplementary material for: A Germline-Targeting Chimpanzee SIV Envelope Glycoprotein Elicits a New Class of V2-Apex Directed Cross-Neutralizing Antibodies
Source: PubMed Central journal article supplement (PMC9973348; doi:10.1128/mbio.03370-22), 2023-01-11
Supplement: mbio.03370-22-s0007.pdf [file mbio.03370-22-s0007.pdf]

**A**

| mAb                   | Tier 1A  |             | Global Neutralization Panel |       |             |       |           |       |        |       |       |        | SHIV Panel |      |         |      |             | SIVcpz   |       |       |           |        |      |      |
|-----------------------|----------|-------------|-----------------------------|-------|-------------|-------|-----------|-------|--------|-------|-------|--------|------------|------|---------|------|-------------|----------|-------|-------|-----------|--------|------|------|
|                       | MW995-26 | TH023-6     | TR011                       | 25710 | CNE8        | X2278 | BJDX01000 | X1632 | Ce1176 | 246F3 | CH119 | Ce0217 | CNE55      | Q23  | CRF-260 | WITO | ZM233       | CAP266SU | CH505 | CH848 | BG05 N332 | MT145K |      |      |
| <b>T927 lineage 1</b> |          |             |                             |       |             |       |           |       |        |       |       |        |            |      |         |      |             |          |       |       |           |        |      |      |
| w32 P2D12             | >250     | >250        | <b>6.6</b>                  | >250  | >250        | >250  | >250      | >250  | >250   | >250  | >250  | >250   | >250       | >250 | >250    | >250 | >250        | >250     | >250  | >250  | >250      | >250   | >250 | >250 |
| <b>T927 lineage 2</b> |          |             |                             |       |             |       |           |       |        |       |       |        |            |      |         |      |             |          |       |       |           |        |      |      |
| w24 P1D08             | >250     | <b>0.04</b> | >250                        | >250  | >250        | >250  | >250      | >250  | >250   | >250  | >250  | >250   | >250       | >250 | >250    | >250 | <b>194</b>  | >250     | >250  | >250  | >250      | >250   | >250 | >250 |
| w24 P2D06             | >250     | <b>0.02</b> | >250                        | >250  | >250        | >250  | >250      | >250  | >250   | >250  | >250  | >250   | >250       | >250 | >250    | >250 | <b>119</b>  | >250     | >250  | >250  | >250      | >250   | >250 | >250 |
| w24 P1D09             | >250     | <b>0.02</b> | >250                        | >250  | >250        | >250  | >250      | >250  | >250   | >250  | >250  | >250   | >250       | >250 | >250    | >250 | <b>119</b>  | >250     | >250  | >250  | >250      | >250   | >250 | >250 |
| <b>T927 lineage 3</b> |          |             |                             |       |             |       |           |       |        |       |       |        |            |      |         |      |             |          |       |       |           |        |      |      |
| w62 P1C05             | >250     | <b>0.05</b> | <b>0.80</b>                 | >250  | <b>59</b>   | >250  | >250      | >250  | >250   | >250  | >250  | >250   | >250       | >250 | >250    | >250 | <b>82</b>   | >250     | >250  | >250  | >250      | >250   | >250 | >250 |
| w62 P1C01             | >250     | <b>0.04</b> | <b>6.9</b>                  | >250  | <b>20.2</b> | >250  | >250      | >250  | >250   | >250  | >250  | >250   | >250       | >250 | >250    | >250 | <b>40.5</b> | >250     | >250  | >250  | >250      | >250   | >250 | >250 |
| <b>T925 lineage 2</b> |          |             |                             |       |             |       |           |       |        |       |       |        |            |      |         |      |             |          |       |       |           |        |      |      |
| w24 P1G03             | >250     |             |                             | >250  |             |       |           |       |        |       |       |        |            |      | >250    |      | >250        |          |       |       |           |        |      |      |
| w24 P1E11             | >250     |             |                             | >250  |             |       |           |       |        |       |       |        |            |      | >250    |      | >250        |          |       |       |           |        |      |      |
| w24 P1F01             | >250     |             |                             | >250  |             |       |           |       |        |       |       |        |            |      | >250    |      | >250        |          |       |       |           |        |      |      |
| w24 P2C12             | >250     |             |                             | >250  |             |       |           |       |        |       |       |        |            |      | >250    |      | >250        |          |       |       |           |        |      |      |
| w24 P1F12             | >250     |             |                             | >250  |             |       |           |       |        |       |       |        |            |      | >250    |      | >250        |          |       |       |           |        |      |      |

IC<sub>50</sub> 250-50µg/ml 49.9-10.0µg/ml 9.9-1.0µg/ml 0.99-0.01µg/ml

**B**

| mAb                   | CAM13K      |              |              |              |              |              |              |              | ZM233       |             |             |             |             |             |              | MW995-26       |                |                |                |              |              |  |
|-----------------------|-------------|--------------|--------------|--------------|--------------|--------------|--------------|--------------|-------------|-------------|-------------|-------------|-------------|-------------|--------------|----------------|----------------|----------------|----------------|--------------|--------------|--|
|                       | CAM13K      | CAM13K-K130N | CAM13K-N156K | CAM13K-N160K | CAM13K-R166S | CAM13K-K168E | CAM13K-K171Q | CAM13K-S186N | ZM233       | ZM233-N160K | ZM233-R166S | ZM233-K168E | ZM233-K169E | ZM233-K171E | MW995-26     | MW995-26-N160K | MW995-26-R166A | MW995-26-K168E | MW995-26-Q171K |              |              |  |
| <b>T927 lineage 1</b> |             |              |              |              |              |              |              |              |             |             |             |             |             |             |              |                |                |                |                |              |              |  |
| w32 P2D12             | <b>188</b>  | <b>140</b>   | <b>2.3</b>   | <b>141</b>   | <b>87</b>    | <b>162</b>   | >250         | <b>233</b>   |             |             |             |             |             |             |              |                |                |                |                |              |              |  |
| <b>T927 lineage 2</b> |             |              |              |              |              |              |              |              |             |             |             |             |             |             |              |                |                |                |                |              |              |  |
| w24 P1D08             | <b>11.5</b> | <b>56</b>    | <b>0.05</b>  | <b>0.36</b>  | >250         | >250         | >250         | <b>40.4</b>  |             |             |             |             |             |             |              |                |                |                |                |              |              |  |
| w24 P2D06             | <b>9.2</b>  | <b>34.6</b>  | <b>0.03</b>  | <b>0.12</b>  | >250         | >250         | >250         | <b>174</b>   | <b>30.1</b> |             |             |             |             |             |              |                |                |                |                |              |              |  |
| w24 P1D09             | <b>10.1</b> | <b>12.4</b>  | <b>0.01</b>  | <b>0.57</b>  | >250         | >250         | >250         | <b>78</b>    | <b>27.4</b> |             |             |             |             |             |              |                |                |                |                |              |              |  |
| <b>T927 lineage 3</b> |             |              |              |              |              |              |              |              |             |             |             |             |             |             |              |                |                |                |                |              |              |  |
| w62 P1C05             | >250        | >250         | <b>9.5</b>   | >250         | >250         | >250         | >250         | >250         | >250        |             |             |             |             |             |              |                |                |                |                |              |              |  |
| w62 P1C01             | >250        | >250         | <b>11.4</b>  | >250         | >250         | >250         | >250         | >250         | >250        |             |             |             |             |             |              |                |                |                |                |              |              |  |
| <b>T927 lineage 4</b> |             |              |              |              |              |              |              |              |             |             |             |             |             |             |              |                |                |                |                |              |              |  |
| w62 P1B01             | >250        | >250         | <b>6.9</b>   | >250         | >250         | >250         | >250         | >250         | >250        |             |             |             |             |             |              |                |                |                |                |              |              |  |
| w62 P1B10             | >250        | >250         | <b>17.1</b>  | >250         | n.d.         | >250         | >250         | >250         | >250        |             |             |             |             |             |              |                |                |                |                |              |              |  |
| w62 P3E08             | >250        | >250         | <b>7.2</b>   | <b>170</b>   | <b>165</b>   | <b>169</b>   | >250         | >250         | >250        |             |             |             |             |             |              |                |                |                |                |              |              |  |
| w62 P1H10             | >250        | >250         | <b>19.0</b>  | >250         | >250         | >250         | >250         | >250         | >250        |             |             |             |             |             |              |                |                |                |                |              |              |  |
| w62 P1F05             | >250        | >250         | <b>6.1</b>   | >250         | >250         | >250         | >250         | >250         | >250        |             |             |             |             |             |              |                |                |                |                |              |              |  |
| w62 P3C02             | <b>215</b>  | <b>142</b>   | <b>1.7</b>   | <b>141</b>   | <b>110</b>   | <b>231</b>   | <b>233</b>   | <b>198</b>   |             |             |             |             |             |             |              |                |                |                |                |              |              |  |
| w62 P1C07             | >250        | >250         | <b>5.0</b>   | >250         | >250         | >250         | >250         | >250         | >250        |             |             |             |             |             |              |                |                |                |                |              |              |  |
| w62 P3A11             | >250        | >250         | <b>5.8</b>   | >250         | >250         | >250         | >250         | >250         | >250        |             |             |             |             |             |              |                |                |                |                |              |              |  |
| <b>T927 lineage 5</b> |             |              |              |              |              |              |              |              |             |             |             |             |             |             |              |                |                |                |                |              |              |  |
| w24 P2B12             | >250        | >250         | <b>50.0</b>  | >250         | >250         | >250         | >250         | >250         | <b>14.0</b> | <b>48.0</b> | >250        | >250        | >250        | >250        | <b>1.4</b>   | >10            | >10            | >10            | >10            | <b>0.91</b>  |              |  |
| w24 P1C02             | >250        | >250         | <b>41.2</b>  | >250         | >250         | >250         | >250         | >250         | <b>68</b>   | <b>61</b>   | >250        | >250        | >250        | >250        | <b>3.5</b>   | >10            | >10            | >10            | >10            | <b>1.0</b>   |              |  |
| w24 P1D03             | >250        | >250         | <b>100</b>   | >250         | >250         | >250         | >250         | >250         | <b>10.1</b> | <b>21.3</b> | >50         | >50         | >50         | >50         | <b>0.76</b>  | <b>6.8</b>     | >10            | >10            | >10            | <b>0.22</b>  |              |  |
| w24 P1A11             | <b>13.6</b> | <b>100</b>   | <b>1.4</b>   | >250         | >250         | >250         | >250         | <b>48.0</b>  | <b>0.52</b> | <b>1.2</b>  | >50         | >50         | >50         | >50         | <b>0.09</b>  | <b>0.73</b>    | >10            | >10            | >10            | <b>0.01</b>  |              |  |
| w62 P1B05             | <b>157</b>  | >250         | <b>1.3</b>   | >250         | >250         | >250         | >250         | >250         | <b>0.62</b> | <b>5.3</b>  | >50         | >50         | <b>46.0</b> | >50         | <b>0.01</b>  | <b>0.30</b>    | >10            | >10            | >10            | <b>0.01</b>  | <b>0.003</b> |  |
| w62 P3G11             | <b>161</b>  | >250         | <b>1.2</b>   | >250         | >250         | >250         | >250         | >250         | <b>2.0</b>  | <b>5.3</b>  | >50         | >50         | >50         | >50         | <b>0.14</b>  | <b>2.5</b>     | >10            | >10            | >10            | <b>0.37</b>  | <b>0.02</b>  |  |
| <b>T925 lineage 1</b> |             |              |              |              |              |              |              |              |             |             |             |             |             |             |              |                |                |                |                |              |              |  |
| w24 P1E09             | <b>1.2</b>  | <b>3.3</b>   | <b>0.04</b>  | >250         | >250         | >250         | >250         | <b>6.6</b>   | <b>0.78</b> | <b>9.5</b>  | <b>17.8</b> | >50         | >50         | >50         | <b>4.0</b>   | >10            | >10            | >10            | >10            | <b>0.007</b> |              |  |
| w24 P1D09             | <b>1.1</b>  | <b>6.8</b>   | <b>0.09</b>  | >250         | >250         | >250         | >250         | <b>4.6</b>   | <b>5.0</b>  | <b>2.5</b>  | >50         | >50         | >50         | >50         | <b>9.0</b>   | >10            | >10            | >10            | >10            | <b>0.009</b> |              |  |
| w24 P2B11             | <b>2.3</b>  | <b>14.0</b>  | <b>0.10</b>  | <b>102</b>   | >250         | >250         | >250         | <b>5.9</b>   | <b>0.77</b> | <b>18.7</b> | <b>17.0</b> | >50         | >50         | >50         | <b>4.9</b>   | >10            | >10            | >10            | >10            | <b>0.02</b>  |              |  |
| w24 P1A12             | <b>0.6</b>  | <b>4.4</b>   | <b>0.05</b>  | <b>219</b>   | >250         | >250         | >250         | <b>3.7</b>   | <b>0.28</b> | <b>13.0</b> | <b>13.0</b> | >50         | >50         | >50         | <b>22.9*</b> | >10            | >10            | >10            | >10            | <b>0.006</b> |              |  |
| w24 P1C08             | <b>6.6</b>  | <b>48.3</b>  | <b>0.46</b>  | >250         | >250         | >250         | >250         | <b>45.4</b>  | <b>2.0</b>  | <b>9.7</b>  | >50         | >50         | >50         | >50         | >10          | >10            | >10            | >10            | >10            | <b>0.05</b>  |              |  |
| <b>T925 lineage 2</b> |             |              |              |              |              |              |              |              |             |             |             |             |             |             |              |                |                |                |                |              |              |  |
| w24 P1G03             | >250        |              |              | >250         |              |              |              | >250         |             |             |             |             |             |             |              |                |                |                |                |              |              |  |
| w24 P1E11             | >250        |              |              | >250         |              |              |              | >250         |             |             |             |             |             |             |              |                |                |                |                |              |              |  |
| w24 P1F01             | >250        |              |              | >250         |              |              |              | >250         |             |             |             |             |             |             |              |                |                |                |                |              |              |  |
| w24 P2C12             | >250        |              |              | >250         |              |              |              | >250         |             |             |             |             |             |             |              |                |                |                |                |              |              |  |
| w24 P1F12             | >250        |              |              | >250         |              |              |              | >250         |             |             |             |             |             |             |              |                |                |                |                |              |              |  |

IC<sub>50</sub> 250-50µg/ml 49.9-10.0µg/ml 9.9-1.0µg/ml 0.99-0.01µg/ml <0.01µg/ml

**FIG S7 Neutralization properties of antibody lineages isolated from SCIV-infected RMs. (A)**

Expanded antibody lineages isolated from SCIV.CAM13K infected RMs with no or very limited tier 2 neutralization breadth. 50% inhibitory concentrations (IC<sub>50</sub>) are shown (µg/ml) for representative members of T927 lineages 1-3 and T925 lineage 2 (listed on the left) against

pseudovirus panels carrying HIV-1 and SIVcpz Envs as well as replicating SHIVs (indicated on top). The highest antibody concentration used was 250  $\mu\text{g/ml}$  (coloring indicates the relative neutralization potency). (B) Epitope mapping of SCIV-induced cross-neutralizing antibodies. Representative members of all isolated antibody lineages (listed on the left) were tested against panels of CAM13K, ZM233 and/or MW965.26 mutants (indicated on top). Given the patterns of early sequence evolution, we mutagenized residues at or near the V2-apex, with an emphasis on key N-linked glycosylation sites and C strand residues. 50% inhibitory concentrations ( $\text{IC}_{50}$ ) are shown ( $\mu\text{g/ml}$ ). An asterisk denotes an estimated  $\text{IC}_{50}$  value (as determined by the Prism software). Only the two most potent and cross-reactive lineages were tested against heterologous ZM233 and MW965.26 mutants. All viruses represent pseudotypes generated by transfection of 293T cells. The highest antibody concentration used was 250  $\mu\text{g/ml}$  (colors indicate the relative neutralization potency).
