# Supplementary material for: A Germline-Targeting Chimpanzee SIV Envelope Glycoprotein Elicits a New Class of V2-Apex Directed Cross-Neutralizing Antibodies
Source: PubMed Central journal article supplement (PMC9973348; doi:10.1128/mbio.03370-22), 2023-01-11
Supplement: mbio.03370-22-s0008.pdf [file mbio.03370-22-s0008.pdf]

A

|                       | FR1                                                                                                     | HCDR1         | FR2                                       | HCDR2 | FR3 | HCDR3                        | FR4                              |
|-----------------------|---------------------------------------------------------------------------------------------------------|---------------|-------------------------------------------|-------|-----|------------------------------|----------------------------------|
| <b>T927 lineage 1</b> |                                                                                                         |               |                                           |       |     |                              |                                  |
| HV4-79*02             | QVQLQESGPGLVKPSSETLSLTCAVSGASISSYVWWSWIRQPPKGLKEWIGELINGNSGSTYINPNSLKSRTVTSKDKASKNQFSLKLSVTAADTAVYYCAR  |               |                                           |       |     |                              |                                  |
| HD3-15*01             |                                                                                                         |               |                                           |       |     | YYEDDYGYIYT                  |                                  |
| HJ6-6*01              |                                                                                                         |               |                                           |       |     |                              | YYGLDSWGQGVVVTVSS                |
| W32_P2D12             | .....R.....                                                                                             | .....N.Y..... | .....T.A.S...Q...F.....H.....N.....I..... |       |     | H.K.F.D...E...LEGAR.....A... |                                  |
| <b>T927 lineage 2</b> |                                                                                                         |               |                                           |       |     |                              |                                  |
| HV5-15*01             | EVQLVQSGAEVKKRQPKGSEKLSCKTSKTSYSPYFVSWISWVRQMPKGLKEWMAIDPSDSDTFRYSYSPFQGVVTSADKSIKSTAYLQWSSKASDSATYYCAR |               |                                           |       |     |                              |                                  |
| HD6-34*01             |                                                                                                         |               |                                           |       |     | CYSSWS                       |                                  |
| HJ1*02                |                                                                                                         |               |                                           |       |     |                              | AEYFFFWGQGLVTVSS                 |
| w24_P1D08             | ...V.....F.....T.SD.....D.....                                                                          |               |                                           |       |     |                              | N.F.VGPH.G.P...D.YSVFEL.N        |
| w24_P2D06             | .....R.....D.....D.....A.....I..V..PT..F.....R.....                                                     |               |                                           |       |     |                              | GPH.TS.PS...D.YSVFEL.S           |
| w24_P1D09             | .....D.T.....E.....A.....H.....T.N.....                                                                 |               |                                           |       |     |                              | GPH.G.PS...D.YSVFEL.S            |
| <b>T927 lineage 3</b> |                                                                                                         |               |                                           |       |     |                              |                                  |
| HV4-149*01            | QVQLQESGPGLVKPSSETLSLTCAVSGGFSYVWWSWIRQPPKGLKEWIGELINGNSGSTYINPNSLKSRTVTSKDKASKNQFSLKLSVTAADTAVYYCAR    |               |                                           |       |     |                              |                                  |
| HD3_15*01             |                                                                                                         |               |                                           |       |     | YYEDDYGYIYT                  |                                  |
| HJ5-5*01              |                                                                                                         |               |                                           |       |     |                              | NSLDWGGRVLTVSS                   |
| W62_P1C05             | .....TT...A.....Y.S.N..FS.....                                                                          |               |                                           |       |     |                              | SERSLLD...D...SSQFSHF.....I..... |
| W62_P1C01             | .....NT...A.....Y.S...F.....R.N.....                                                                    |               |                                           |       |     |                              | SERSLLD...D...SSQFSQF.....I..... |
| <b>T927 lineage 4</b> |                                                                                                         |               |                                           |       |     |                              |                                  |
| HV4-149*01            | QVQLQESGPGLVKPSSETLSLTCAVSGGFSYVWWSWIRQPPKGLKEWIGELINGNSGSTYINPNSLKSRTVTSKDKASKNQFSLKLSVTAADTAVYYCAR    |               |                                           |       |     |                              |                                  |
| HD3_15*01             |                                                                                                         |               |                                           |       |     | YYEDDYGYIYT                  |                                  |
| HJ4-3*01              |                                                                                                         |               |                                           |       |     |                              | YFDYWGQGLVTVSS                   |
| W62_P1B01             | .....R.....T.....T.....S.....T.S.T...A.TG...E.S.I...VT.....                                             |               |                                           |       |     |                              | TRPRLLD...D...S.YSVFEL.N         |
| W62_P1B10             | .....T.....S.H.....R.....D.VT.PR.T...A.I..Q.....VT.....                                                 |               |                                           |       |     |                              | TRPRLLD...D...D.YSVFEL.S         |
| W62_P3E08             | .....E.....A.....G.....D.VT.PR.T...G.Q...L.D.V.....                                                     |               |                                           |       |     |                              | TRPRLLD...D...FD.YSVFEL.S        |
| W62_P1H10             | .....D.S.H.T.....S.....N.....RVA.....                                                                   |               |                                           |       |     |                              | TRPRLLD...D...D.YSVFEL.S         |
| W62_P1F05             | .....H.T.....VT.PR.T...Q.T...RVT.....                                                                   |               |                                           |       |     |                              | TRPRLLD...D...D.YSVFEL.F         |
| W62_P3C02             | .....G.....A.R.....D.Q.L.R.T.....F.....                                                                 |               |                                           |       |     |                              | TRPRLLD...D...FD.YSVFEL.S        |
| W62_P1C07             | .....V.....S.H.T...S.R.....VT.PR.T...S.N...R.T.....                                                     |               |                                           |       |     |                              | TRPRLLD...D...D.YSVFEL.S         |
| W62_P3A11             | .....H.T.V.....VT.PR.T...Q.V.NK...RMT.....                                                              |               |                                           |       |     |                              | TRPRLLD...D...D.YSVFEL.F...LP    |
| <b>T927 lineage 5</b> |                                                                                                         |               |                                           |       |     |                              |                                  |
| HV3-50*01             | EVQLVESGGGLVQPGGSLRLSCAASGFTFSSYGMHWVRQAPKGLKEWVAISYDGGSKKYADSVKDRFTISRDNKNMLYLQMNLLKLEDTAVYYCAR        |               |                                           |       |     |                              |                                  |
| HD3-15*01             |                                                                                                         |               |                                           |       |     | YYEDDYGYIYT                  |                                  |
| HJ5-4*03              |                                                                                                         |               |                                           |       |     |                              | NRFDWGQGLVTVSS                   |
| w24_P2B12             | .....N.I.....A.S...I.....G.....T.K.....                                                                 |               |                                           |       |     |                              | DRVN...S...Q.WG.L...P            |
| w24_P1C02             | .....I.S.I.....A.S...I...EP.A.K.T.IVF...S.....                                                          |               |                                           |       |     |                              | DRVN...S...Q.WG.L...             |
| w24_P1D03             | .....F.....A.H.I.....D.A.S...I...F.E.L.G.L.T.IV.....                                                    |               |                                           |       |     |                              | DRIN...S...F.Q.WG.L...           |
| w24_P1A11             | .....D.....K.....I.N.I.....G.S...YI.....G.....T.MV.F.K.A.F.....                                         |               |                                           |       |     |                              | DRVN...S...F.Q.WG.L...           |
| w24_P1B05             | .....L.....K.....F.PM..F.F.....D.G.SN.RYI...RG...T.RSSV...DT.R...I.F...DRIN.NYS.DG.Q.WG.L...P           |               |                                           |       |     |                              | DRIN.NYS.DG.Q.WG.L...P           |
| w24_P3G11             | .....F.....D.H.A.....R.D.A.SN.K.I...EFAMA...T.TIV...H.....                                              |               |                                           |       |     |                              | DRIN..ASADQ.WG.L...              |
| <b>T925 lineage 1</b> |                                                                                                         |               |                                           |       |     |                              |                                  |
| HV4-117*01            | QVQLQESGPGLVKPSSETLSLTCAVSGGSISSYVWWSWIRQPPKGLKEWIGELIYSGGGSTYINPNSLKSRTVTSKDKASKNQFSLKLSVTAADTAVYYCAR  |               |                                           |       |     |                              |                                  |
| HD3-15*01             |                                                                                                         |               |                                           |       |     | YYEDDYGYIYT                  |                                  |
| HJ4-3*01              |                                                                                                         |               |                                           |       |     |                              | YFDYWGQGLVTVSS                   |
| w24_P1E09             | .....N.N.....VF.RD...SL.....N.R.....                                                                    |               |                                           |       |     |                              | SPS...F...LG...D                 |
| w24_P1D09             | .....R.....F.RD...N.N.....H.....                                                                        |               |                                           |       |     |                              | SPS...F...LG...D                 |
| w24_P2B11             | .....G.N.....F.RD...N.N.....F.....                                                                      |               |                                           |       |     |                              | SPN...F...LG...D                 |
| w24_P1A12             | .....M.....F.RD...N.N.....T.....                                                                        |               |                                           |       |     |                              | SPN...F...LG...D                 |
| w24_P1C08             | .....F.D...S.N..L.....                                                                                  |               |                                           |       |     |                              | SPN...E.H.LG...C...P             |
| <b>T925 lineage 2</b> |                                                                                                         |               |                                           |       |     |                              |                                  |
| HV4-NL_33*01          | QVQLQESGPGLVKPSSETLSLTCAVSGGSISSYVWWSWIRQPPKGLKEWIGELIYSGGGSTYINPNSLKSRTVTSKDKASKNQFSLKLSVTAADTAVYYCAR  |               |                                           |       |     |                              |                                  |
| HD3-18*01             |                                                                                                         |               |                                           |       |     | YYGSGYIYT                    |                                  |
| HJ6-6*01              |                                                                                                         |               |                                           |       |     |                              | YYGLDSWGQGVVVTVSS                |
| w24_P1F12             | .....SD...A.....L...G.N.H.....R...V.....M..V.VKWG...NM.F.....                                           |               |                                           |       |     |                              | V.VKWG...NM.F.....               |
| w24_P1F01             | .....D..P.....S.....G.A...R...F...LL.....F.V.VKWG...NM.F.....                                           |               |                                           |       |     |                              | V.VKWG...NM.F.....               |
| w24_P2C12             | .....V..P.....S.I.A.D...H.Y.....G.GE.....P.....S.....                                                   |               |                                           |       |     |                              | MKWG...D..NY.....                |
| w24_P1G03             | .....VG.P...T...T.....F.A.T...R...AV.A.N.E.....                                                         |               |                                           |       |     |                              | MKWG...D..NY.....                |
| w24_P1E11             | .....R.....V...V...S...N...R...S...H.R.....                                                             |               |                                           |       |     |                              | MKWG...D..KYA.....G...           |

B

|                       | FR1                                                                                             | LCDR1 | FR2 | LCDR2 | FR3 | LCDR3        | FR4         |
|-----------------------|-------------------------------------------------------------------------------------------------|-------|-----|-------|-----|--------------|-------------|
| <b>T927 lineage 1</b> |                                                                                                 |       |     |       |     |              |             |
| LV3-40*01             | SYELLQPSRSVSPGQTARITCGDNIQSKSVQWYQKPPQAPVLVIYADSERPSGIPERFSGNSGNTATLITISGVEAGDEADYICQWDSDDH     |       |     |       |     |              |             |
| LJ2A*01               |                                                                                                 |       |     |       |     | QVFGGGTRL    |             |
| W32_P2D12             | .....R.....S.I.....I.....                                                                       |       |     |       |     |              | GTDHP.....  |
| <b>T927 lineage 2</b> |                                                                                                 |       |     |       |     |              |             |
| LV2S9*01              | QAALTQPPSVKSLGQSVTISCTGTSNDVGGYNDVSWYQHPGTAPRLLIYDVKSRPSGVDRFSGSKSGNTASLTISGLQAEADYICQSYRSGST   |       |     |       |     |              |             |
| LJ1*01                |                                                                                                 |       |     |       |     | FIFGAGTRLTV  |             |
| w24_P1D08             | .....L.....S...I.A.D...H.Y.....G.GE.....P.....S.....                                            |       |     |       |     |              |             |
| w24_P2D06             | .....SV.....S.I.A...V.....S.T.....I.....G.....                                                  |       |     |       |     |              |             |
| w24_P1D09             | .....S.I.A...V.....S.T.....I.....G.....                                                         |       |     |       |     |              |             |
| <b>T927 lineage 3</b> |                                                                                                 |       |     |       |     |              |             |
| LV1-85*01             | QSVLTQPPSVGAPGQVITISCTGSSNIIGYVQWYQQLPGTAPKLLIYENKRPSPGVDRFSGSKSGTASLTITGLQSEADYICQSYDSSLSA     |       |     |       |     |              |             |
| LJ2A*01               |                                                                                                 |       |     |       |     | QVFGGGTRL    |             |
| W62_P1C05             | .....L.....N.....V.....D...A.....R.....                                                         |       |     |       |     |              | H...FS..... |
| W62_P1C01             | .....L.....N.....A.....R.A.....E.....                                                           |       |     |       |     |              | H...FS..... |
| <b>T927 lineage 4</b> |                                                                                                 |       |     |       |     |              |             |
| LV1-67*2              | QSVLTQPPSVSAAPGQVITISCTGSSNIIGYVQWYQQLPGTAPKLLIYQDNKRPSPGVDRFSGSKSGTASLAITGLQSEADYICQAWDSSLSA   |       |     |       |     |              |             |
| LJ3*01                |                                                                                                 |       |     |       |     | VLFGGGTRL    |             |
| W62_P1B01             | .....F.....V.....T.....A.....V...S.L.....A.S...T.H...I.....                                     |       |     |       |     |              | T.T.VL..... |
| W62_P1B10             | .....F.....V.....T.....A.....V...S.L.....A.S...T.H...I.....                                     |       |     |       |     |              | T.T.VL..... |
| W62_P3E08             | .....F.....V.....T.....A.....V...S.L.....A.S...T.H...I.....                                     |       |     |       |     |              | T.T.VL..... |
| W62_P1H10             | .....F.....V.....T.....A.....V...S.L.....A.S...T.H...I.....                                     |       |     |       |     |              | T.T.VL..... |
| W62_P1F05             | .....F.....T.....T.....H.A.A...V...S.L.....A.S...T.H...I.....                                   |       |     |       |     |              | T.T.VL..... |
| W62_P3C02             | .....F.....T.....T.....H.A.A...V...S.L.....A.S...T.H...I.....                                   |       |     |       |     |              | T.T.VL..... |
| W62_P1C07             | .....F.....T.....T.....H.A.A...V...S.L.....A.S...T.H...I.....                                   |       |     |       |     |              | T.T.VL..... |
| W62_P3A11             | .....F.....Y...KN.....A.....V...S.L.....A.S...T.H...I.....                                      |       |     |       |     |              | T.T.VL..... |
| <b>T927 lineage 5</b> |                                                                                                 |       |     |       |     |              |             |
| KV2-104*02            | DIVMTQTFLSLPVTGPEPASISCRSSQLLDSDEGNTYLDWYKLPQSPQLLIYEVSNRASGVPDRFSGSGSDTDFTLKISRVEADYICQALEFF   |       |     |       |     |              |             |
| KJ1*01                |                                                                                                 |       |     |       |     | WTFGGQTKVEIK |             |
| w24_P2B12             | .....T.....A.....G...R.....                                                                     |       |     |       |     |              |             |
| w24_P1C02             | .....T.....A.....G...D...R.....                                                                 |       |     |       |     |              |             |
| w24_P1D03             | .....T.....A.....G...R.....                                                                     |       |     |       |     |              |             |
| w24_P1A11             | .....T.....A.....G...R.....                                                                     |       |     |       |     |              |             |
| w24_P1B05             | .....G.....T.....I.....T.....A.....G...H...R.....                                               |       |     |       |     |              |             |
| w24_P3G11             | .....R.....F.....T.....A.....G...H...R.....                                                     |       |     |       |     |              |             |
| <b>T925 lineage 1</b> |                                                                                                 |       |     |       |     |              |             |
| KV1-94*01             | DIQMTQSPSSLSASVGRVTVTCRASQGINKELSWYQKPKGKAPTELLIYAASSLQTVSSSRFSGSGSDTFTLTISSLQPEDVATYYCQQDYTTPT |       |     |       |     |              |             |
| KJ4*01                |                                                                                                 |       |     |       |     | ITFGGQTKVEIK |             |
| w24_P1E09             | .....L.....S.....R.....                                                                         |       |     |       |     |              |             |
| w24_P1D09             | .....D.....H.T.....N.....S.....                                                                 |       |     |       |     |              |             |
| w24_P2B11             | .....D.....S.R.....A.....R.....                                                                 |       |     |       |     |              |             |
| w24_P1A12             | .....E.R.....A.H.....F.....S.....R.....                                                         |       |     |       |     |              |             |
| w24_P1C08             | .....D.....S.....                                                                               |       |     |       |     |              |             |
| <b>T925 lineage 2</b> |                                                                                                 |       |     |       |     |              |             |
| LV2_23*02             | QAALTQPPSMGSPGQVITISCTGTSNDVGGYNDVSWYQHPGKAPKLLIYEVSNRASGVPDRFSGSKSGTASLTISGLQAEADYICSSYAGSNTF  |       |     |       |     |              |             |
| LJ3*01                |                                                                                                 |       |     |       |     | VLFGGGTRL    |             |
| w24_P1F12             | .....S.....F.....T.....L...N.....S.....I.F.....                                                 |       |     |       |     |              |             |
| w24_P1F01             | .....S.....G.A...N.....H.....                                                                   |       |     |       |     |              |             |
| w24_P2C12             | .....S.....H.....K...T.....L...R.....                                                           |       |     |       |     |              |             |
| w24_P1G03             | .....S.....G...R.....T.....KSL.....                                                             |       |     |       |     |              |             |
| w24_P1E11             | .....S.....G.....N.....T.....L...V.....                                                         |       |     |       |     |              |             |

**FIG. S8 Heavy and light chain variable region sequences of antibody lineages isolated from SCIV-infected RMs.** (A, B) Heavy (H, panel A) and light (lambda [L] and kappa [K], panel B) chain variable region sequences of mature lineage members isolated from RMs T927 and T925 (listed on the left) are aligned to the deduced amino acid sequences of their respective germline variable (V), diversity (D), and joining (J) genes (indicated on the top). Framework (FR) and complementary determining regions (CDR) are color coded, with HCDR1 and LCDR1, HCDR2 and LCDR2, and HCDR3 and LCDR3 highlighted in blue, pink and red, respectively. Predicted sulfated tyrosines in the HCDR3 region (using the GPS-TSP 1.0 software at a high threshold setting) are highlighted in yellow (98). Expanded lineages (listed on the left) were identified using SONAR's automated "unseeded" lineage assignment tool, followed by manual inspection of gene assignments, HCDR3 regions, and non-templated nucleotides to confirm membership (Genbank accession numbers are listed in Table S2E at <https://doi.org/10.6084/m9.figshare.21644675>).
