# Supplementary material for: A Germline-Targeting Chimpanzee SIV Envelope Glycoprotein Elicits a New Class of V2-Apex Directed Cross-Neutralizing Antibodies
Source: PubMed Central journal article supplement (PMC9973348; doi:10.1128/mbio.03370-22), 2023-01-11
Supplement: mbio.03370-22-s0010.pdf [file mbio.03370-22-s0010.pdf]

**Table S1. Neutralization sensitivity of wildtype and modified SIV Envs to V2-apex bNAbs and their inferred precursors**

| Neutralization sensitivity <sup>1</sup>          | PG9<br>RUA <sup>2</sup> | PG16<br>RUA <sup>2</sup> | VRC26<br>UCA <sup>2</sup> | CH01<br>RUA <sup>2</sup> | PG9   | PG16  | VRC26.25 | CH01 |
|--------------------------------------------------|-------------------------|--------------------------|---------------------------|--------------------------|-------|-------|----------|------|
| SIVcpz.LB7                                       | >50                     | >50                      | >50                       | >50                      | >10   | 1.4   | 0.08     | >10  |
| SIVcpz.LB7 Q171K                                 | >50                     | >50                      | >50                       | >50                      | 0.73  | >10   | 0.07     | 7.6  |
| SIVcpz.MB897                                     | >50                     | >50                      | >50                       | >50                      | 0.09  | 0.05  | 0.001    | >10  |
| SIVcpz.MB897 Q171K                               | >50                     | >50                      | >50                       | >50                      | 0.03  | 0.01  | 0.001    | 1.2  |
| SIVcpz.MB897 Q171K + N130K                       | >50                     | >50                      | >50                       | >50                      | 0.003 | 0.003 | 0.0007   | 0.18 |
| SIVcpz.MB66                                      | >50                     | >50                      | >50                       | >50                      | >10   | 0.01  | 0.07     | >10  |
| SIVcpz.MB66 Q171K                                | >50                     | >50                      | >50                       | >50                      | >10   | 5.8   | 0.04     | >10  |
| SIVcpz.CAM13                                     | >50                     | >50                      | >50                       | >50                      | 0.02  | 0.09  | 0.002    | >10  |
| SIVcpz.CAM13 Q171K                               | 28.2                    | 37.7                     | >50                       | >50                      | 0.007 | 0.003 | 0.002    | 0.09 |
| SIVcpz.MT145                                     | >50                     | >50                      | >50                       | >50                      | 0.16  | 0.34  | 0.0003   | >10  |
| SIVcpz.MT145 Q171K                               | >50                     | >50                      | >50                       | 2.7                      | 0.04  | 0.03  | 0.002    | 0.34 |
| SIVcpz.DP943.2                                   | >50                     | >50                      | >50                       | >50                      | 0.02  | 0.02  | 0.001    | 6.8  |
| SIVcpz.DP943.2 Q171K                             | >50                     | >50                      | >50                       | 1.0                      | 0.007 | 0.006 | 0.0007   | 0.06 |
| SIVcpz.DP943.2 Q171K + N156 glycan (K156N+F158S) | >50                     | >50                      | >50                       | 49.1                     | 0.01  | 0.009 | 0.009    | 0.15 |
| SIVgor.BPID1                                     | >50                     | >50                      | >50                       | >50                      | >10   | >10   | >10      | >10  |
| SIVgor.BPID1 E170K + Q171K                       | >50                     | >50                      | >50                       | >50                      | >10   | 4.3   | >10      | >10  |
| SIVgor.CP2139                                    | >50                     | >50                      | >50                       | >50                      | >10   | >10   | >10      | >10  |
| SIVgor.CP2139 T169K + T170K                      | >50                     | >50                      | >50                       | >50                      | 0.12  | 0.76  | >10      | 2.8  |
| SIVgor.CP2139 T169K + T170K + K166R              | >50                     | >50                      | >50                       | >50                      | 0.14  | 8.1   | 0.008    | >10  |
| SIVgor.CP2139 T169K + T170K + K166R + N130K      | >50                     | >50                      | >50                       | >50                      | 0.01  | 9.6   | 0.004    | >10  |
| SIVgor.BQID2                                     | >50                     | >50                      | >50                       | >50                      | >10   | 4.9   | >10      | >10  |
| SIVgor.BQID2 S170K + Q171K                       | >50                     | >50                      | >50                       | >50                      | 0.45  | 0.79  | >10      | >10  |
| SIVgor.BQID2 S170K + Q171K + N130T               | >50                     | >50                      | >50                       | >50                      | 3.2   | >10   | >10      | >10  |
| SIVcpz.TAN10                                     | >50                     | >50                      | >50                       | >50                      | >10   | 1.9   | >10      | 5.6  |
| SIVcpz.TAN10 Q171K                               | >50                     | >50                      | >50                       | >50                      | 0.13  | >10   | >10      | 7.0  |
| SIVmus.11GAB                                     | n.t                     | n.t                      | n.t                       | n.t.                     | 0.54  | 9.5   | 0.54     | >10  |
| SIVmus.11GAB Q171K                               | >50                     | >50                      | >50                       | >50                      | 0.12  | 1.8   | 0.92     | 6.5  |
| SIVmus.1085 4-12                                 | n.t                     | n.t                      | n.t                       | n.t.                     | 0.14  | 0.006 | 0.03     | >10  |
| SIVmus.1085 4-12 Q171K                           | >50                     | >50                      | >50                       | >50                      | 0.03  | 0.04  | 0.02     | 1.17 |
| SIVasc.RT11                                      | n.t                     | n.t                      | n.t                       | n.t.                     | 0.47  | >10   | >10      | >10  |
| SIVasc.RT11 H171K                                | >50                     | >50                      | >50                       | >50                      | 0.09  | >10   | >10      | 9.3  |
| SIVasc.RT11 H171K + K166R                        | >50                     | >50                      | >50                       | >50                      | 0.05  | 0.55  | >10      | 2.6  |
| SIVasc.RT11 H171K + A170K                        | >50                     | >50                      | >50                       | >50                      | 0.31  | >10   | >10      | >10  |

<sup>1</sup>Numbers indicating IC<sub>50</sub> values (µg/ml) as determined in the TZM-bl assay (n.t., not tested). The highest antibody concentration used was 50 µg/ml (colors indicate relative neutralization potency).

<sup>2</sup>RUA, reverted unmutated ancestor; UCA, unmutated common ancestor.
